# Supplementary material for: The density, nanohardness and some optical properties of As–S and As–Se chalcogenide bulk glasses and thin films
Source: Royal Society of Chemistry journal article supplement (doi:10.1039/d0ra08939g), 2020-01-01
Supplement: d0ra08939g1.pdf [file d0ra08939g1.pdf]

**Electronic supplementary information to the manuscript entitled:**

**The density, nanohardness and some optical properties of As-S and As-Se chalcogenide bulk glasses and thin films**

P. Knotek<sup>b</sup>, P. Kutálek<sup>a\*</sup>, E. Černošková<sup>a</sup>, M. Vlček<sup>a</sup> and L. Tichý<sup>b</sup>

<sup>a</sup> University of Pardubice, Faculty of Chemical Technology, Joint Laboratory of Solid State Chemistry, Studentská 84, 532 10 Pardubice, Czech Republic

<sup>b</sup> University of Pardubice, Faculty of Chemical Technology, Department of General and Inorganic Chemistry, Studentská 573, 532 10 Pardubice, Czech Republic

\* Corresponding author: Tel.: +420 466036155; E-mail: petr.kutalek@upce.cz

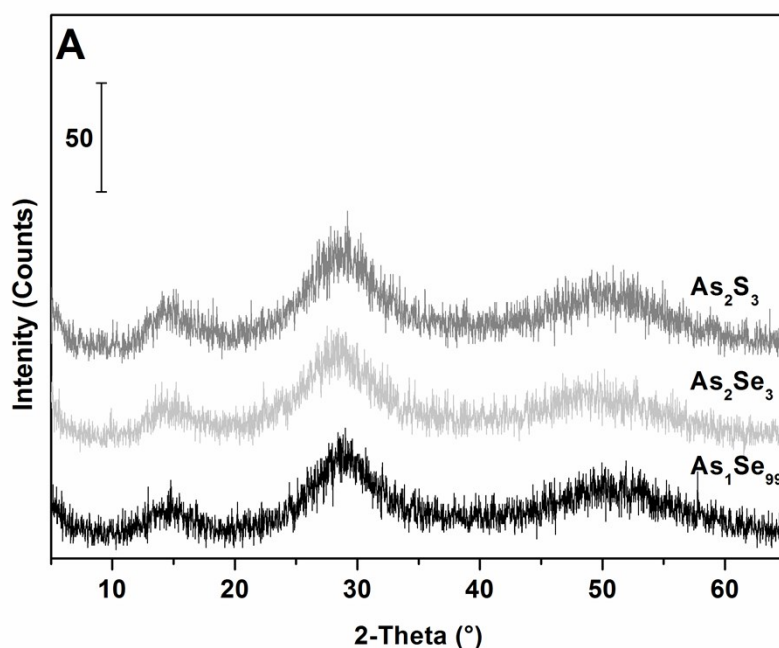

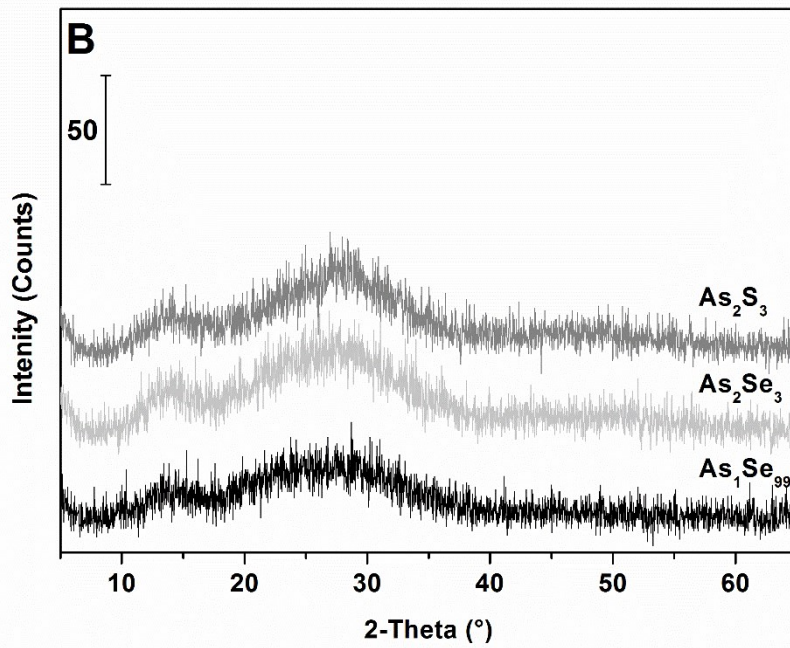

Fig. A.1 XRD of  $As_2S_3$ ,  $As_2Se_3$  and  $As_1Se_{99}$  bulk glasses (A) and the corresponding thin films (B).

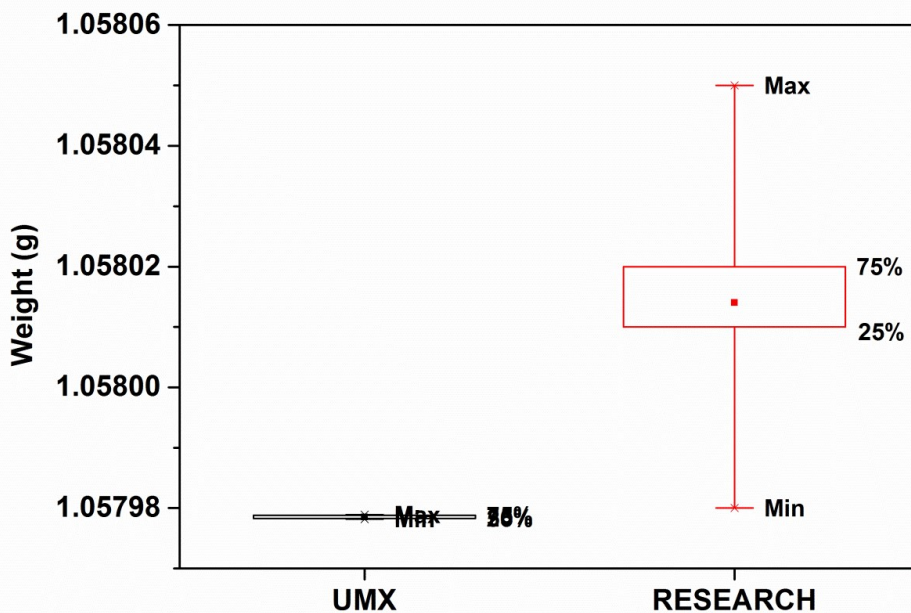

Fig. A.2 The box-plot of the substrate weight measured with the UMX and RESEARCH balances formed from the minimal and maximal value (whiskers), values of 25th and 75th percentil and the arithmetic mean (solid square in the box).
